# Supplementary material
Source: PubMed Central journal article supplement (PMC6136049)

## Supplementary Online Content

Dupas B, Minvielle W, Bonnin S, et al. Association between vessel density and visual acuity in patients with diabetic retinopathy and poorly controlled type 1 diabetes. *JAMA Ophthalmol*. Published online May 10, 2018. doi:10.1001/jamaophthalmol.2018.1319

**eTable 1.** Baseline Characteristics of Patients

**eTable 2.** ANOVA Model for Foveal Avascular Zone (FAZ) Area in the Control and Diabetes Groups

**eTable 3.** ANOVA Model for Vessel Density (VD) in SVP, ICP, DCP, and DCC in the Control and Diabetes Groups

**eFigure 1.** Adjusted Difference Means for Foveal Avascular Zone (FAZ) Area

**eFigure 2.** Adjusted Difference Means for Foveal Avascular Zone (FAZ) Area and for Vessel Density (VD) in SVP, DCC, ICP, and DCP

**eFigure 3.** Angiograms of Plexuses in the Eyes of the Control and Diabetes Groups With Normal or Decreased Visual Acuity (VA)

This supplementary material has been provided by the authors to give readers additional information about their work.

**eTable 1.** Baseline Characteristics of Patients

| Patients                                    | Controls        | DR<br>Normal VA | DR<br>decreased VA                    | <i>P</i> |
|---------------------------------------------|-----------------|-----------------|---------------------------------------|----------|
| No. of patients/eyes                        | 12/12           | 13/13           | 9/9                                   | -        |
| Men/total, n                                | 5/7             | 7/13            | 4/9                                   | 0.5      |
| Age, median [range], years                  | 31 [23-40]      | 31 [21-40]      | 28 [21-40]                            | 0.21     |
| Duration of diabetes, median [range], years | -               | 15,5 [2-27]     | 16,4 [11-22]                          | 0.98     |
| HbA1c %, median, [range]                    | -               | 9 [6.7-12]      | 8.8 [6,7-10]                          | 0.83     |
| VA median [range], LogMAR, Snellen Eq       | 0               | 0<br>20/20      | 0.12 [0.1-0.2]<br>20/25 [20/25-20/32] | <0.0001  |
| PRP (%)                                     | -               | 13 (100)        | 9 (100)                               | -        |
| DR stage where PRP was performed :          |                 |                 |                                       |          |
| Severe NPDR                                 | -               | 4               | 2                                     | -        |
| PDR                                         | -               | 9               | 7                                     | -        |
| Previous anti-VEGF IVI for PDR, n (%)       | -               | 2 (15,4)        | 4 (44,4)                              | 0.18     |
| CSFT, mean [range], μm                      | 254 [224 – 268] | 269 [214-312]   | 263 [231 - 289]                       | 0.55     |
| ILM-IPL thickness, mean [range], μm         | 110 [100 – 123] | 112 [79-132]    | 119 [98-153]                          | 0.57     |
| IPL-RPE thickness, mean [range], μm         | 145 [117-162]   | 158 [116-203]   | 145 [98-182]                          | 0.46     |

DR : diabetic retinopathy; VA = visual acuity; PRP = panretinal photocoagulation; IVI = intravitreal injection; CSFT = central subfield thickness; ILM = internal limiting membrane; IPL = inner plexiform layer; RPE = retinal pigment epithelium; NPDR : non proliferative diabetic retinopathy; PDR : proliferative diabetic retinopathy

**eTable 2.** ANOVA Model for Foveal Avascular Zone (FAZ) Area in the Control and Diabetes Groups

|                                                                                                                       | <b>Control Normal<br/>VA<br/>N=12</b> | <b>Diabetic<br/>Normal VA<br/>N=13</b> | <b>Diabetic<br/>Decreased VA<br/>N=9</b> |
|-----------------------------------------------------------------------------------------------------------------------|---------------------------------------|----------------------------------------|------------------------------------------|
| <b>FAZ area (mm<sup>2</sup>) = Group of patients (Control Normal VA / Diabetic Normal VA / Diabetic Decreased VA)</b> |                                       |                                        |                                          |
| Group of patients effect, p = <b>0.0003</b>                                                                           |                                       |                                        |                                          |
| <b>Adjusted means</b>                                                                                                 |                                       |                                        |                                          |
| LSMeans (SE)                                                                                                          | 0.194 (0.036)                         | 0.302 (0.035)                          | 0.447 (0.042)                            |
| [LSM 95% CI]                                                                                                          | [0.120; 0.268]                        | [0.231; 0.374]                         | [0.362; 0.533]                           |
| <b>Adjusted means: Difference Control Normal VA vs Diabetic Normal VA</b>                                             |                                       |                                        |                                          |
| LSMeans (SE)                                                                                                          |                                       | 0.109 (0.050)                          |                                          |
| [LSM 95% CI]                                                                                                          |                                       | [0.006; 0.211]                         |                                          |
| Contrast, p =                                                                                                         |                                       | <b>0.0387</b>                          |                                          |
| <b>Adjusted means: Difference Diabetic Normal VA vs Diabetic Decreased VA</b>                                         |                                       |                                        |                                          |
| LSMeans (SE)                                                                                                          |                                       |                                        | 0.145 (0.054)                            |
| [LSM 95% CI]                                                                                                          |                                       |                                        | [0.034; 0.256]                           |
| Contrast, p =                                                                                                         |                                       |                                        | <b>0.0124</b>                            |

VA = visual acuity; FAZ : foveal avascular zone

**eTable 3.** ANOVA Model for Vessel Density (VD) in SVP, ICP, DCP, and DCC in the Control and Diabetes Groups

|                                                                                                                                               | <b>Control Normal<br/>VA<br/>N=12</b> | <b>Diabetic<br/>Normal VA<br/>N=13</b>      | <b>Diabetic<br/>Decreased VA<br/>N=9</b>    |
|-----------------------------------------------------------------------------------------------------------------------------------------------|---------------------------------------|---------------------------------------------|---------------------------------------------|
| <b>VD in SVP = Group of patients (Control Normal VA / Diabetic Normal VA / Diabetic Decreased VA) :</b> Group of patients effect , p = <.0001 |                                       |                                             |                                             |
| <b>Adjusted means</b>                                                                                                                         |                                       |                                             |                                             |
| LSMeans (SE)<br>[LSM 95% CI]                                                                                                                  | 49.1 (0.9)<br>[47.2; 51.0]            | 44.1 (0.9)<br>[42.3; 45.9]                  | 39.6 (1.1)<br>[37.5; 41.8]                  |
| <b>Adjusted means: Difference Control Normal VA vs Diabetic Normal VA</b>                                                                     |                                       |                                             |                                             |
| LSMeans (SE)<br>[LSM 95% CI]<br>Contrast, p =                                                                                                 |                                       | -5.0 (1.3)<br>[-7.5; -2.4]<br><b>0.0004</b> |                                             |
| <b>Adjusted means: Difference Diabetic Normal VA vs Diabetic Decreased VA</b>                                                                 |                                       |                                             |                                             |
| LSMeans (SE)<br>[LSM 95% CI]<br>Contrast, p =                                                                                                 |                                       |                                             | -4.5 (1.4)<br>[-7.3; -1.7]<br><b>0.0025</b> |

|                                                                                                                                                         |                            |                                             |                                                 |
|---------------------------------------------------------------------------------------------------------------------------------------------------------|----------------------------|---------------------------------------------|-------------------------------------------------|
| <b>VD in ICP = Group of patients (Control Normal VA / Diabetic Normal VA / Diabetic Decreased VA) :</b> Group of patients effect , p = <b>&lt;.0001</b> |                            |                                             |                                                 |
| <b>Adjusted means</b>                                                                                                                                   |                            |                                             |                                                 |
| <b>VD in DCP = Group of patients (Control Normal VA / Diabetic Normal VA / Diabetic Decreased VA) :</b> Group of patients effect , p = <b>&lt;.0001</b> |                            |                                             |                                                 |
| <b>Adjusted means</b>                                                                                                                                   |                            |                                             |                                                 |
| LSMeans (SE)<br>[LSM 95% CI]                                                                                                                            | 30.5 (1.0)<br>[28.4; 32.6] | 24.5 (1.0)<br>[22.5; 26.5]                  | 15.2 (1.2)<br>[12.8; 17.6]                      |
| <b>Adjusted means: Difference Control Normal VA vs Diabetic Normal VA</b>                                                                               |                            |                                             |                                                 |
| LSMeans (SE)<br>[LSM 95% CI]<br>Contrast, p =                                                                                                           |                            | -6.1 (1.4)<br>[-8.9; -3.2]<br><b>0.0002</b> |                                                 |
| <b>Adjusted means: Difference Diabetic Normal VA vs Diabetic Decreased VA</b>                                                                           |                            |                                             |                                                 |
| LSMeans (SE)<br>[LSM 95% CI]<br>Contrast, p =                                                                                                           |                            |                                             | -9.3 (1.5)<br>[-12.4; -6.1]<br><b>&lt;.0001</b> |
| <b>VD in DCC = Group of patients (Control Normal VA / Diabetic Normal VA / Diabetic Decreased VA) :</b> Group of patients effect , p = <b>&lt;.0001</b> |                            |                                             |                                                 |
| <b>Adjusted means</b>                                                                                                                                   |                            |                                             |                                                 |
| LSMeans (SE)<br>[LSM 95% CI]                                                                                                                            | 50.6 (1.3)<br>[48.0; 53.2] | 44.3 (1.2)<br>[41.7; 46.8]                  | 34.6 (1.5)<br>[31.6; 37.7]                      |
| <b>Adjusted means: Difference Control Normal VA vs Diabetic Normal VA</b>                                                                               |                            |                                             |                                                 |
| LSMeans (SE)<br>[LSM 95% CI]<br>Contrast, p =                                                                                                           |                            | -6.3 (1.8)<br>[-9.9; -2.7]<br><b>0.0013</b> |                                                 |
| <b>Adjusted means: Difference Diabetic Normal VA vs Diabetic Decreased VA</b>                                                                           |                            |                                             |                                                 |
| LSMeans (SE)<br>[LSM 95% CI]<br>Contrast, p =                                                                                                           |                            |                                             | -9.6 (1.9)<br>[-13.6; -5.7]<br><b>&lt;.0001</b> |

A : visual acuity; VD : vessel density; SVP: superficial vascular plexus; DCC : deep capillary complex; ICP : intermediate capillary complex; DCP : deep capillary plexus

**eFigure 1.** Adjusted Difference Means for Foveal Avascular Zone (FAZ) Area

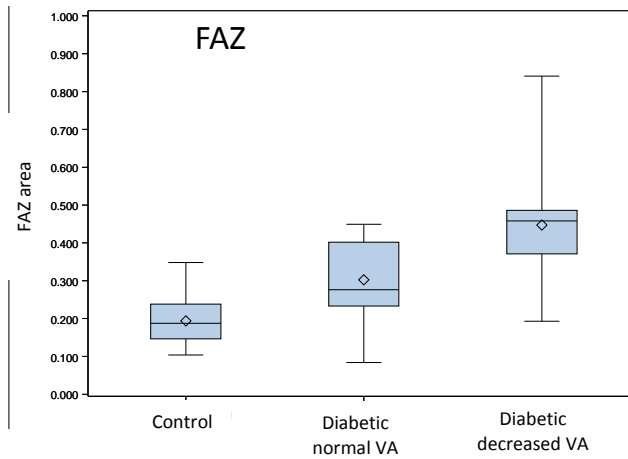

**FAZ : foveal avascular zone**

The ANOVA shows that diabetic patients with a decreased VA have a greater FAZ area compared to diabetic patients with a normal VA. However, the confidence intervals largely overlap, making this parameter less relevant than VD to explain VA.

**eFigure 2.** Adjusted Difference Means for Foveal Avascular Zone (FAZ) Area and for Vessel Density (VD) in the SVP, DCC, ICP, and DCP

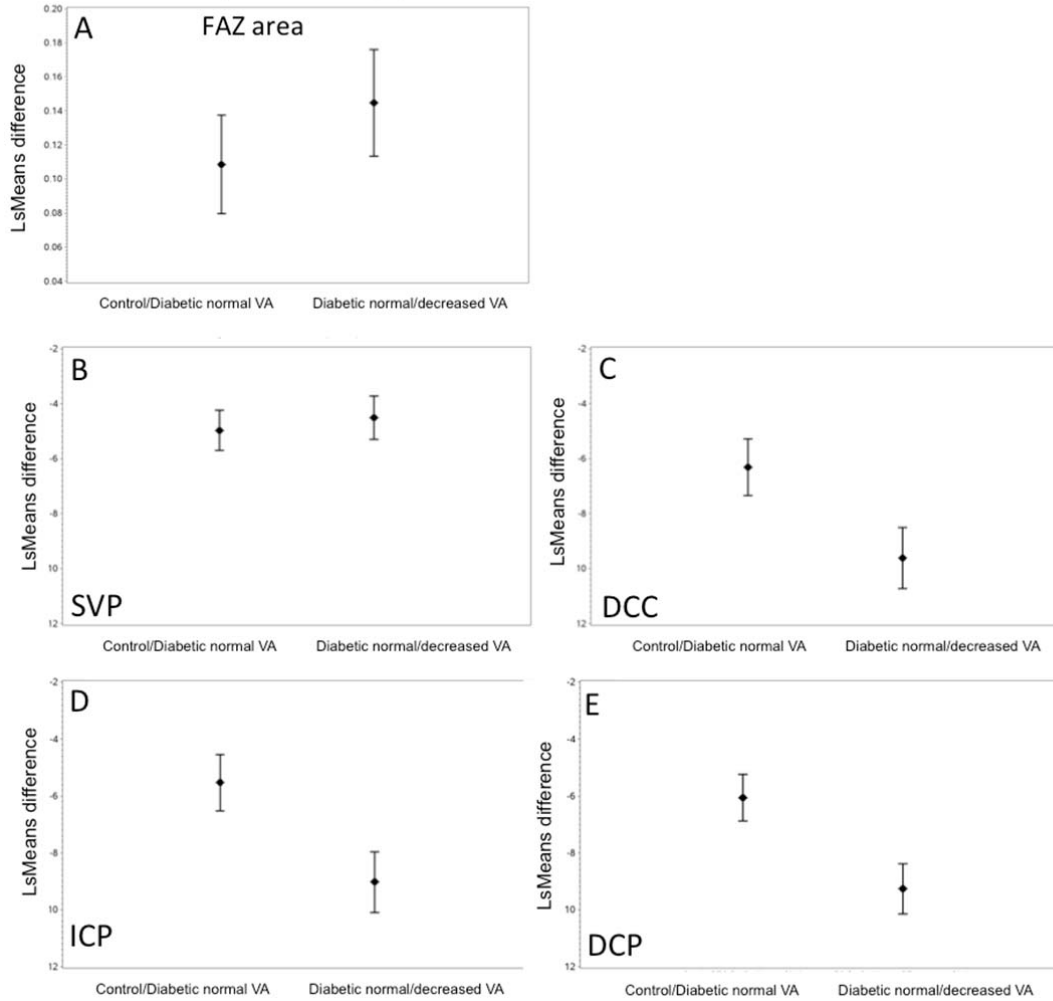

**FAZ :** foveal avascular zone  
**SVP :** superficial vascular plexus  
**DCC :** deep capillary complex  
**ICP :** intermediate capillary plexus  
**DCP :** deep capillary plexus

Diabetic patients with a decreased VA have a greater mean VD decrease (compared with diabetic patients with normal VA) in the deep plexuses (deep capillary complex [C], intermediate capillary plexus [D] and deep capillary plexus [E]), than in the superficial vascular plexus [B].

**eFigure 3.** Angiograms of Plexuses in the Eyes of the Control and Diabetes Groups With Normal or Decreased Visual Acuity (VA)

Capillary dropouts are present in all diabetic eyes compared to controls, and more pronounced in eyes with a decreased visual acuity than in eyes with a normal visual acuity. The decrease is more pronounced in the deep capillary plexus (DCP) than in the superficial vascular plexus (SVP).

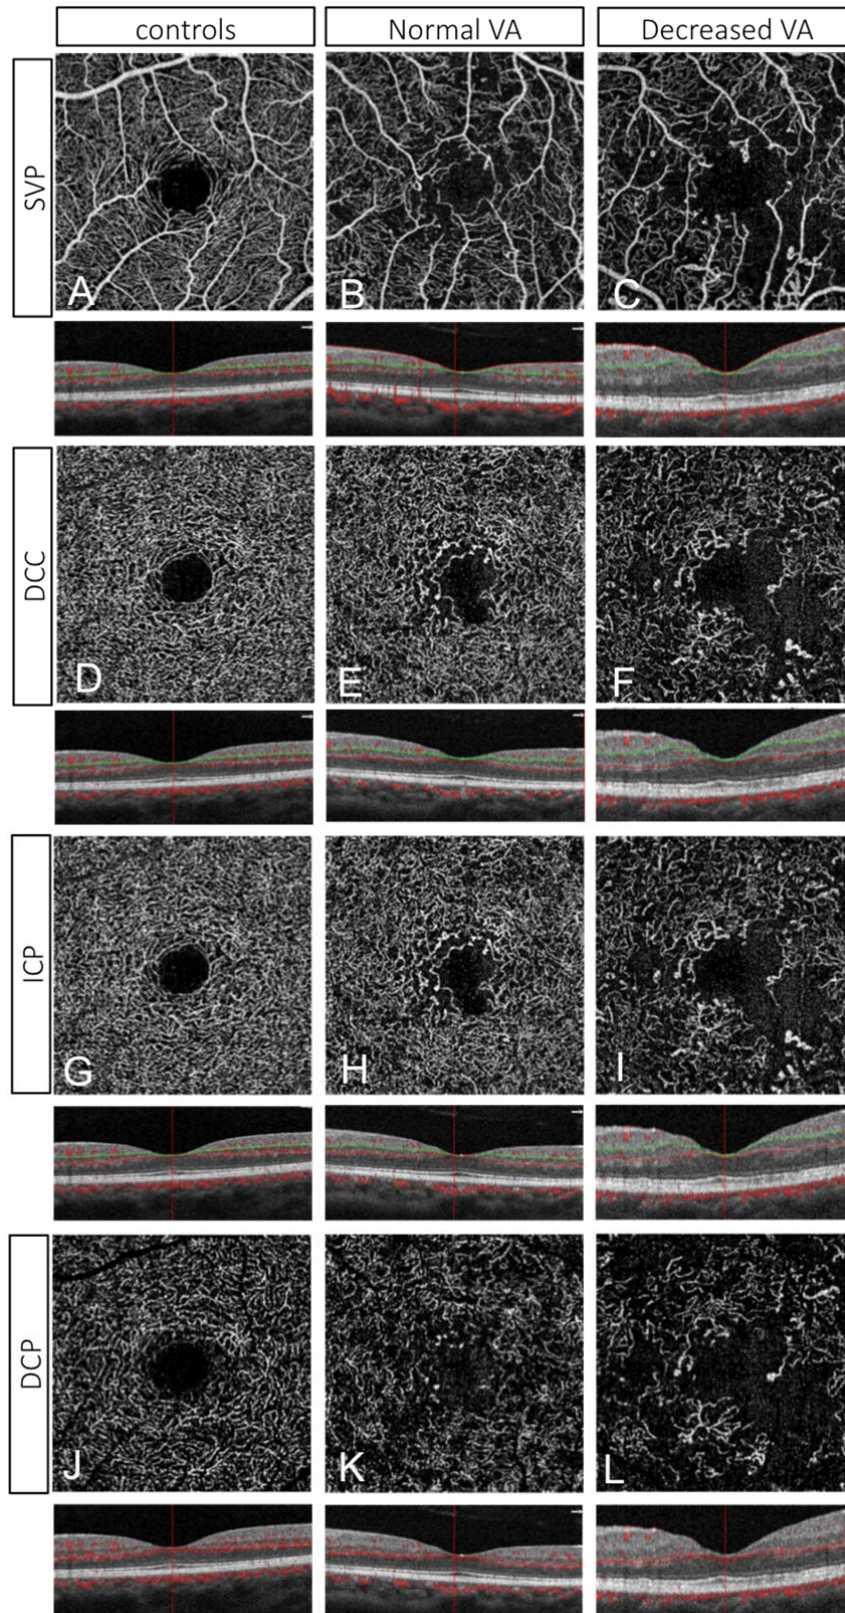

Supplement: jamaophthalmol-136-721-s001.pdf [file jamaophthalmol-136-721-s001.pdf]
